# Supplementary material for: Low-cost ternary Ni–Fe–P catalysts supported on Ni foam for hydrolysis of ammonia borane
Source: Royal Society of Chemistry journal article supplement (doi:10.1039/c9qi00048h), 2019-01-01
Supplement: c9qi00048h1.pdf [file c9qi00048h1.pdf]

## Electronic Supplementary Information (ESI)

### Low-cost ternary Ni-Fe-P catalysts supported on Ni foam for hydrolysis of ammonia borane

Jingang Yang,<sup>\*a,b</sup> Qi Yuan,<sup>a</sup> Yuan Liu,<sup>a</sup> Xianglong Huang,<sup>a</sup> Yanxiu Qiao,<sup>a</sup> Junnan Lu<sup>a</sup> and Chunlin Song<sup>a</sup>

<sup>a</sup> School of Materials and Energy, Southwest University, Chongqing 400715, China

<sup>b</sup> Institute for Clean Energy & Advanced Materials, Southwest University, Chongqing 400715, PR China.

E-mail: yjg20140716@swu.edu.cn

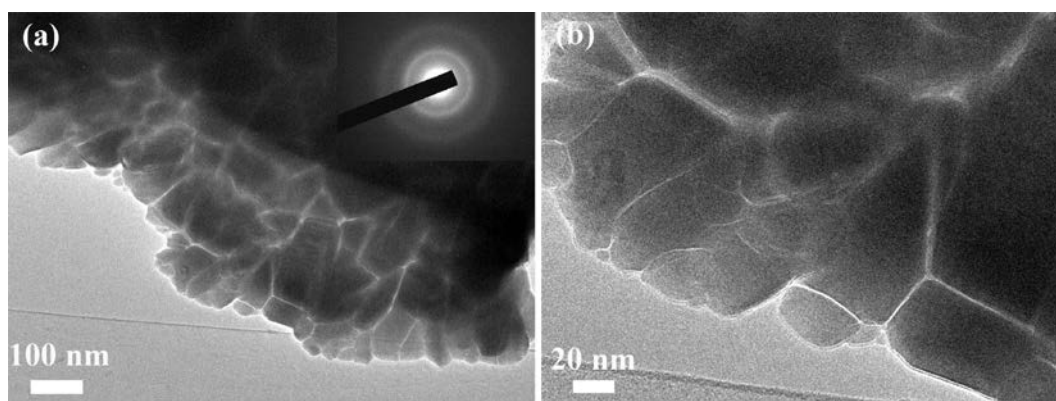

Fig. S1 TEM images of the as-prepared Ni-Fe-P catalyst. The inset of (a) is the SAED pattern of an individual Ni-Fe-P fragments.

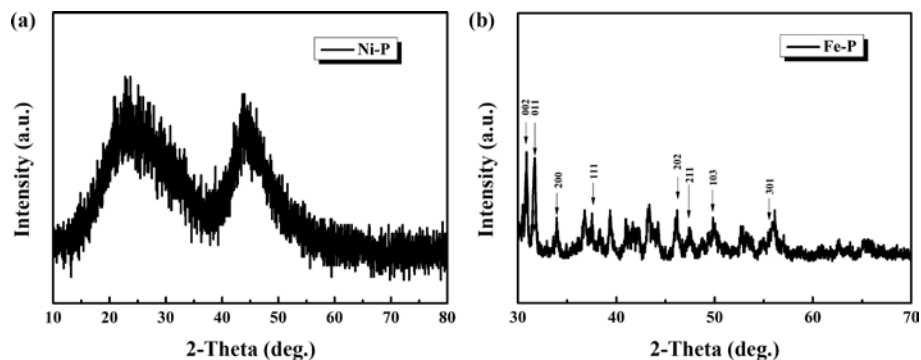

Fig. S2 XRD images of as-prepared Ni-P catalyst (a) and Fe-P catalyst (b).

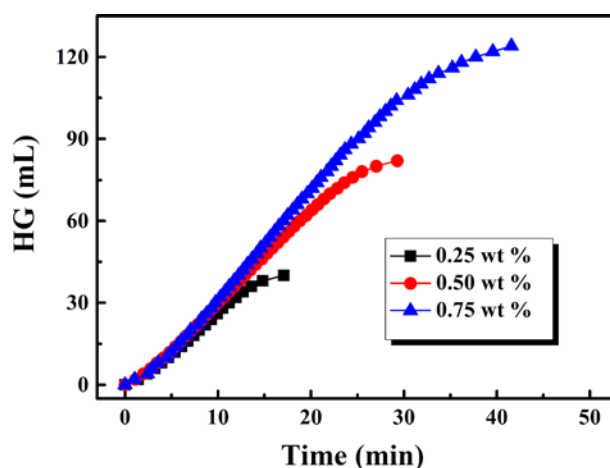

Fig. S3 Hydrogen release from aqueous  $\text{NH}_3\text{BH}_3$  solution (8 mL, 30 °C) with different concentrations in the presence of Ni-Fe-P/Ni foam catalyst. The mass of catalyst is 5 mg.

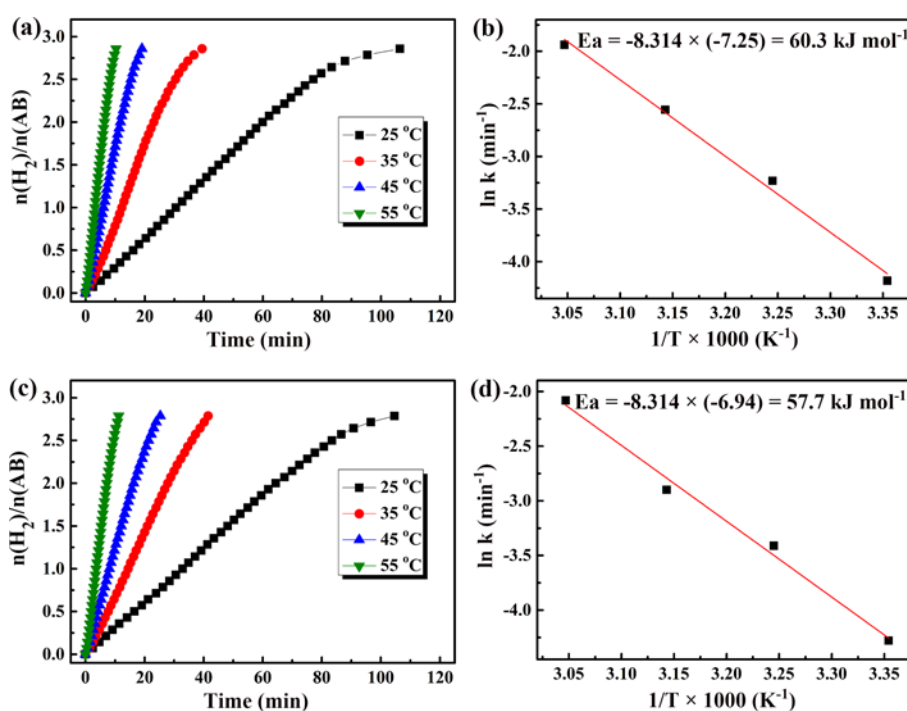

Fig. S4  $\text{H}_2/\text{NH}_3\text{BH}_3$  molar ratio vs time for Ni-P/Ni foam (a) and Fe-P/Ni foam (c) catalyzed hydrolysis of AB (0.5 wt %, 8 ml) at four different temperatures in the range of 25–55 °C; the mass of catalyst is 5 mg. The corresponding Arrhenius plot (b) and (d) obtained from the data in panel (a) and (c).

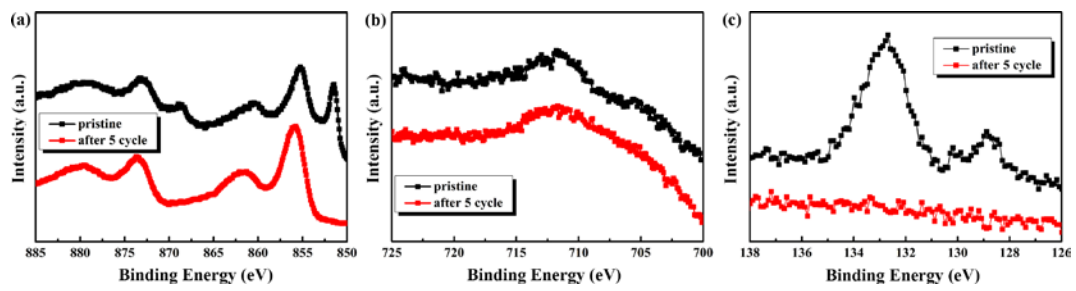

Fig. S5 XPS spectra of Ni 2p (a), Fe 2p (b), and P 2p (c) of pristine and cycled Ni-Fe-P/Ni foam catalysts.
